# Supplementary material for: Facile synthesis of nitrogen-defective g-C3N4 for superior photocatalytic degradation of rhodamine B
Source: Royal Society of Chemistry journal article supplement (doi:10.1039/d1ra05535f), 2021-01-01
Supplement: d1ra05535f1.pdf [file d1ra05535f1.pdf]

## Supporting Information

### Facile synthesis of nitrogen-defective g-C<sub>3</sub>N<sub>4</sub> for superior photocatalytic degradation of rhodamine B

Xiupei Yang,<sup>\*a</sup> Lin Zhang,<sup>a</sup> Dan Wang,<sup>a</sup> Qian Zhang,<sup>a</sup> Jie Zeng, Run Zhang,<sup>\*b</sup>

*<sup>a</sup>College of Chemistry and Chemical Engineering, Chemical Synthesis and Pollution Control  
Key Laboratory of Sichuan Province, China West Normal University, Nanchong 637000,  
China. E-mail: xiupeiyang@163.com*

*<sup>b</sup>Australian Institute for Bioengineering and Nanotechnology, The University of Queensland,  
Brisbane, Queensland 4072, Australia. E-mail: r.zhang@uq.edu.au*

\*Corresponding author

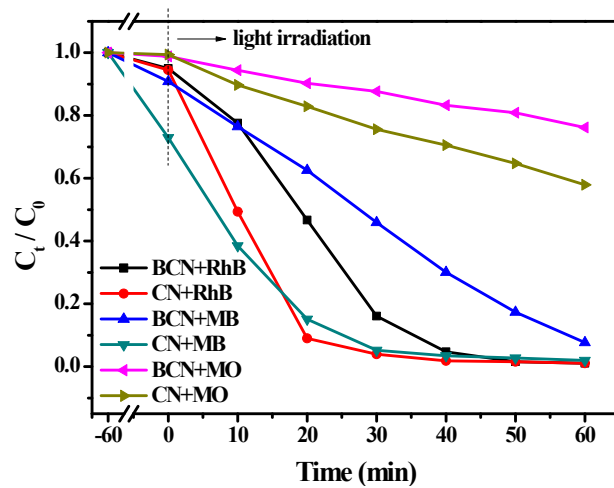

**Fig. S1.** Degradation curves of RhB, MO and MB by BCN and CN.

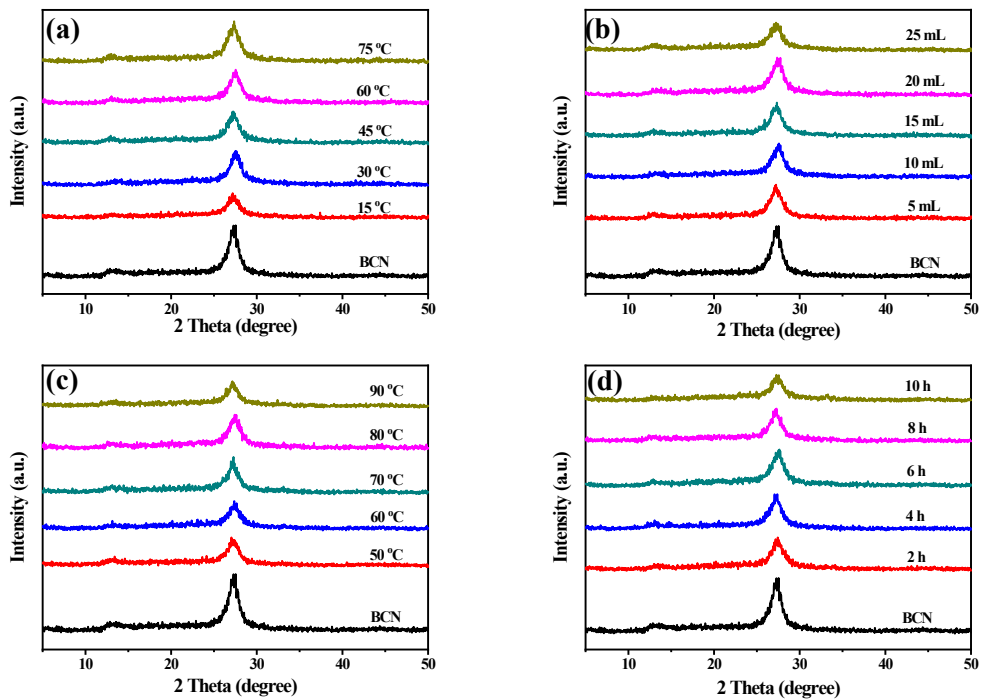

**Fig. S2.** XRD patterns of g-C<sub>3</sub>N<sub>4</sub> synthesized under different modification conditions: (a) different water treatment temperature, (b) different water treatment consumption, (c) different precursor drying temperature, and (d) different precursor drying time.

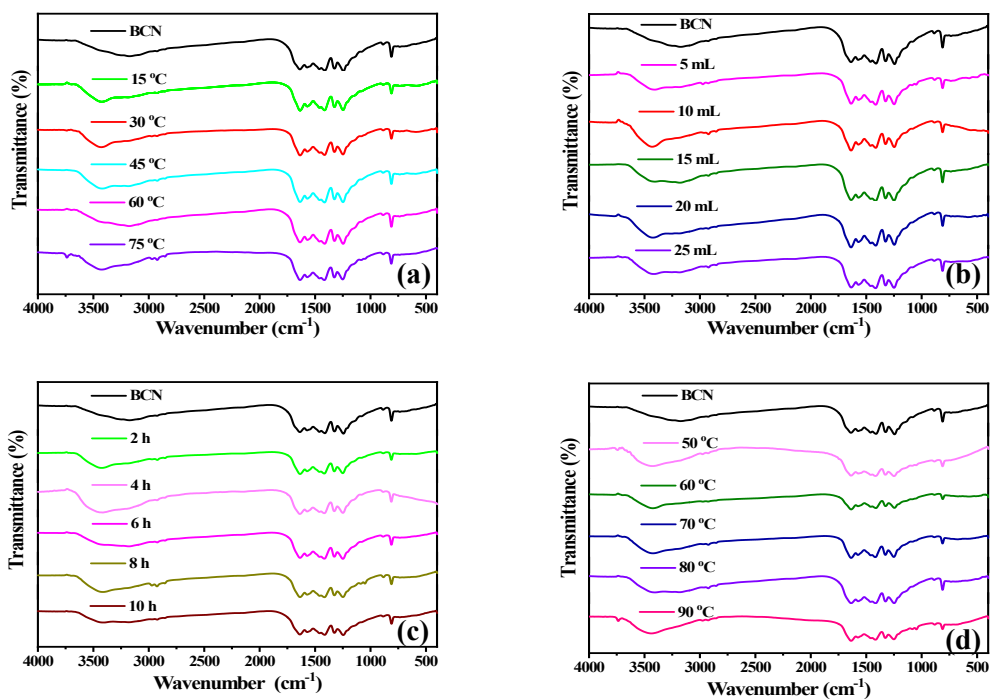

**Fig. S3.** FT-IR spectra of g-C<sub>3</sub>N<sub>4</sub> under different modification conditions: (a) different water treatment temperature, (b) different water treatment consumption, (c) different precursor drying temperature, and (d) different precursor drying time.

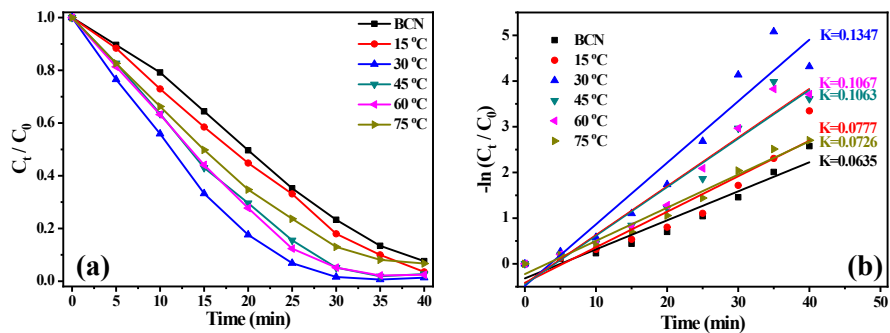

**Fig. S4.** The g-C<sub>3</sub>N<sub>4</sub> material prepared by optimizing the precursor melamine different water treatment temperature for RhB degradation: (a) the degradation curve, (b) the first-order kinetics fitting curve.

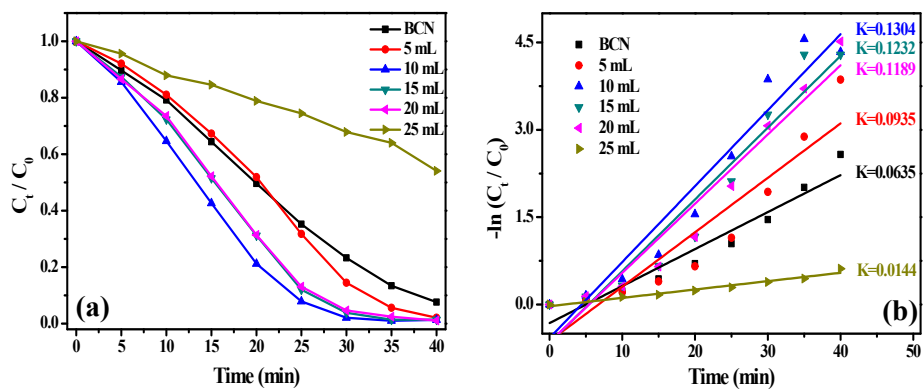

**Fig. S5.** The g-C<sub>3</sub>N<sub>4</sub> material prepared by optimizing the precursor melamine different water treatment consumption for RhB degradation: (a) the degradation curve, (b) the first-order kinetics fitting curve.

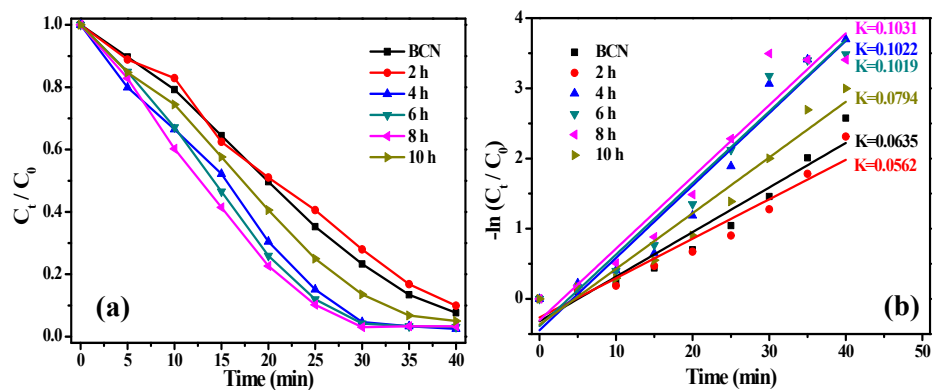

**Fig. S6.** The g-C<sub>3</sub>N<sub>4</sub> material prepared by optimizing the precursor melamine different drying time for RhB degradation: (a) the degradation curve, (b) the first-order kinetics fitting curve.

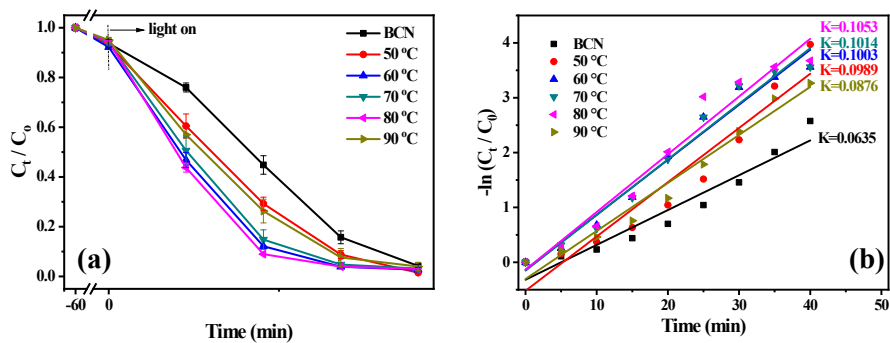

**Fig. S7.** The g-C<sub>3</sub>N<sub>4</sub> material prepared by optimizing the precursor melamine different drying temperature for RhB degradation: (a) the degradation curve, (b) the first-order kinetics fitting curve.



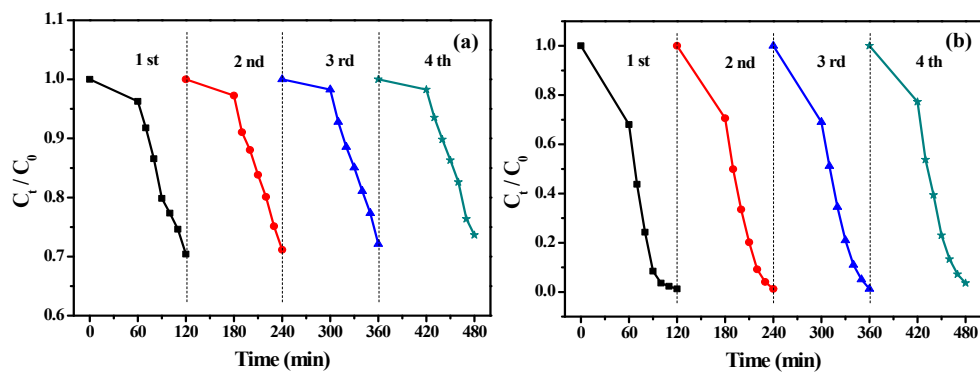

Fig. S8. Degradation cycle curves of MO(a) and MB(b) by CN.

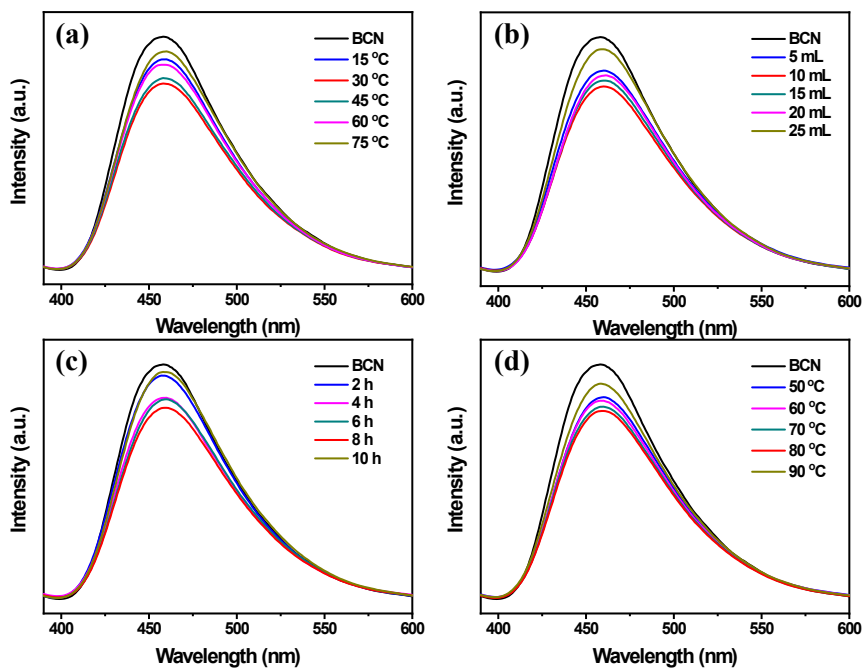

**Fig. S9.** PL spectrum of g-C<sub>3</sub>N<sub>4</sub> synthesized under different modification conditions: (a) Different water treatment temperature, (b) Different water treatment consumption, (c) Different precursor drying time, (d) Different precursor drying temperature.

---

**Table S1.** EDS elemental analysis of BCN and CN.

| Element | C       | N       | C/N   |
|---------|---------|---------|-------|
| BCN     | 51.30 % | 48.70 % | 1.053 |
| CN      | 63.41 % | 35.59 % | 1.782 |
